# Supplementary material for: The Ubiquitin Ligase CHIP Integrates Proteostasis and Aging by Regulation of Insulin Receptor Turnover
Source: PubMed Central journal article supplement — Cell. 2017 Apr 20;169(3):470–482.e13. doi: 10.1016/j.cell.2017.04.003 (PMC5406386; doi:10.1016/j.cell.2017.04.003), 2017-04-20
Supplement: mmc2.pdf [file mmc2.pdf]

**DAF-16 distribution without heat shock**

| <b>Strain</b>       | <b>Cytoplasmic (%)</b> | <b>Nuclear (%)</b> | <b>Number of worms</b> |
|---------------------|------------------------|--------------------|------------------------|
| WT                  | 89                     | 11                 | 100                    |
| <i>chn-1(by155)</i> | 96                     | 4                  | 100                    |
| CHN-1::FLAG         | 67                     | 33                 | 100                    |

**DAF-16 distribution after heat shock (35 °C for 5 minutes)**

| <b>Strain</b>       | <b>Cytoplasmic (%)</b> | <b>Nuclear (%)</b> | <b>Number of worms</b> |
|---------------------|------------------------|--------------------|------------------------|
| WT                  | 77                     | 23                 | 100                    |
| <i>chn-1(by155)</i> | 87                     | 13                 | 100                    |
| CHN-1::FLAG         | 52                     | 48                 | 100                    |

**DAF-16 distribution after heat shock (35 °C for 7 minutes)**

| <b>Strain</b>       | <b>Cytoplasmic (%)</b> | <b>Nuclear (%)</b> | <b>Number of worms</b> |
|---------------------|------------------------|--------------------|------------------------|
| WT                  | 42                     | 58                 | 100                    |
| <i>chn-1(by155)</i> | 74                     | 26                 | 100                    |
| CHN-1::FLAG         | 47                     | 53                 | 100                    |

**Supplementary Table 2 related to Figure 1.** *chn-1* Deficient Worms Exhibit Delayed Nuclear Localization of DAF-16::GFP Triggered by Heat Shock.
