# Supplementary material for: The Ubiquitin Ligase CHIP Integrates Proteostasis and Aging by Regulation of Insulin Receptor Turnover
Source: PubMed Central journal article supplement — Cell. 2017 Apr 20;169(3):470–482.e13. doi: 10.1016/j.cell.2017.04.003 (PMC5406386; doi:10.1016/j.cell.2017.04.003), 2017-04-20
Supplement: mmc3.pdf [file mmc3.pdf]

**Supplemental Table 3 related to Star Methods. Primer sequences.**

| <b>oligo name and sequence</b>                                                                                          | <b>source</b> |
|-------------------------------------------------------------------------------------------------------------------------|---------------|
| <i>chn-1</i> Forward: 5'<br>GGGAATTCCATATGGCCACCATGTACTG<br>ATATCGAAATGAACCGCCTGGGTAAGATGT<br>CAAGCGGCGCCGAAC 3'        | This Study    |
| <i>chn-1</i> Reverse: 5'<br>CCGCCGCTCGAGAACCATGCCTCCGGGTT<br>C 3'                                                       | This Study    |
| <i>chn-1</i> H218Q Forward: 5'<br>GAAATTGTGCAGCAGTTGAGAAGAATTGG<br>3'                                                   | This Study    |
| <i>chn-1</i> H218Q Reverse: 5'<br>CCAATTCTTCTCAACTGCTGCACAATTC 3'                                                       | This Study    |
| <i>chn-1</i> ΔU-box Forward: 5'<br>GGGAATTCCATATGGCCACCATGTACTG<br>ATATCGAAATGAACCGCCTGGGTAAGATGT<br>CAAGCGGCGCCGAAC 3' | This Study    |
| <i>chn-1</i> ΔU-box Reverse: 5'<br>CCGCCGCTCGAGCTCCCTGTTTTGCCGTTT<br>TTCTTG 3'                                          | This Study    |
| <i>chn-1</i> N9D, K13A, Forward: 5'<br>GAACAACATGATACTAATGGCAAAAAGTGT<br>TATATGAATAAAAAG 3'                             | This Study    |
| <i>chn-1</i> N9D, K13A, Reverse: 5'<br>CTTTTATTCATATAACACTTTTTGCCATTAG<br>TATCATGTTGTTTC 3'                             | This Study    |
| <i>chn-1</i> K73A, Forward: 5'<br>GAGCCCAAACGAAGTGAAAGTAAGCTTTCA<br>ACTCTTGAAG 3'                                       | This Study    |
| <i>chn-1</i> K73A, Reverse: 5'<br>CTTCAAGAGTTGAAAGCTTACTTTCACTTC<br>GTTTGGGCTC 3'                                       | This Study    |
| <i>ufd-2</i> Forward: 5'<br>CGGGGTACCATGATTGAAGACGAGAAAGC<br>AG 3'                                                      | This Study    |
| <i>ufd-2</i> Reverse: 5'<br>GTACGGCCGTTATTTCTTTGAATTTCTTTTC<br>TGG 3'                                                   | This Study    |
| <i>wwp-1</i> Forward: 5'<br>TCCCCCGGGGGGAATGGCTCGTAATGAA<br>CCATCATC 3'                                                 | This Study    |
| <i>wwp-1</i> Reverse: 5'<br>CCGACGTCGACGCGTCTACTCGTTTCCAAA<br>TCCTCCG 3'                                                | This Study    |
| <i>sip-1</i> Forward (qPCR): 5'<br>AAGAGATCGTTCACTCGCCAG 3'                                                             | This Study    |

|                                                                           |                          |
|---------------------------------------------------------------------------|--------------------------|
| <i>sip-1</i> Reverse (qPCR): 5'<br>AGCCAAGTCGACGTCCTTTG 3'                | This Study               |
| <i>sod-3</i> Forward (qPCR): 5'<br>TTCTGACATCACTATTGCGG 3'                | This Study               |
| <i>sod-3</i> Reverse (qPCR): 5'<br>GTTGGCAATCTTCCAAATAGC 3'               | This Study               |
| <i>act-3</i> Forward (qPCR): 5'<br>CCACCATGTACCCAGGAATT 3'                | This Study               |
| <i>act-3</i> Reverse (qPCR): 5'<br>AGAGGGAAGCGAGGATAGAT 3'                | This Study               |
| <i>tbg-1</i> Forward (qPCR): 5'<br>CAATGTGCCCATCAATTCGG 3',               | This Study               |
| <i>tbg-1</i> Reverse (qPCR): 5'<br>AACAAGAAGCGAGTGACGTC 3'                | This Study               |
| MBP-INSR Forward:<br>5'CAGGGAATTCGGCCCCCTCATCTTTGTC-<br>3'                | This Study               |
| MBP-INSR Reverse:<br>5'CCGAGCGTGGAATTCTTAGGAAGGATTG<br>GACCGAGGC-3'       | This Study               |
| INSR-Forward:<br>5'-CAGGAAGCTTGCGATGGCCACCGGG<br>GCCGGC-3'                | This Study               |
| INSR-Reverse:<br>5'-CGAGCGTGCGATCGTTAGGAAGGAT<br>TGGACCGAGGCAAGG-3'       | This Study               |
| INSR-Forward K1047R:<br>5'-GCAATGCCAGGGACATCATCAGGG<br>GTGAGGCAGAGACC-3'  | This Study               |
| INSR-Reverse K1047R:<br>5'-GGTCTCTGCCTCACCCCTGATGATG<br>TCCCTGGCATTGCC-3' | This Study               |
| INSR-Forward (qPCR):<br>5'-CAGTGATGTGTTTCCATGCTC-3'                       | This Study               |
| INSR-Reverse (qPCR):<br>5'-CACCCCTTGATGATGTCCCT-3'                        | This Study               |
| GAPDH-Forward (qPCR):<br>5'-TGAGAAGTATGACAACAGCCT -3                      | Ulbricht et al.,<br>2015 |
| GAPDH-Reverse (qPCR):<br>5'-GATGATGTTCTGGAGAGCCC -3'                      | Ulbricht et al.,<br>2015 |
| B2M-Forward (qPCR):<br>5'-TGTCCTTCAGCAAGGACTGG -3'                        | Ulbricht et al.,<br>2015 |
| B2M-Reverse (qPCR):<br>5'-GCAAGCAAGCAGAATTTGGA -3'                        | Ulbricht et al.,<br>2015 |
| dINSR-Forward-Ncol:<br>5'GAATTCGCCATGGTACTCAGCGGAG<br>AACAACATTTG-3'      | This Study               |

|                                                                 |            |
|-----------------------------------------------------------------|------------|
| dINSR-Reverse-XhoI:<br>5'-GCTTACTCGAGTTACGCCTCCCTTCCG<br>ATG-3' | This Study |
|-----------------------------------------------------------------|------------|
